# Supplementary material for: Comparative Study of the Orientation and Order Effects on the Thermoelectric Performance of 2D and 3D Perovskites
Source: MDPI journal article supplement (doi:10.3390/nano14050446), 2024-02-28
Supplement: s1 [file s1]

# Supplementary Information

Article

## Comparative study of the orientation and order effects on the thermoelectric performance of 2D and 3D perovskites

Yi-Hsiang Wang <sup>1,†</sup>, Cheng-Hsien Yeh <sup>1,†</sup>, I-Ta Hsieh <sup>2</sup>, Po-Yu Yang <sup>2</sup>, Yuan-Wen Hsiao <sup>1</sup>, Hsuan-Ta Wu <sup>3</sup>, Chun-Wei Pao <sup>2\*</sup>, and Chuan-Feng Shih <sup>1,4,5\*</sup>

<sup>1</sup> Department of Electrical Engineering, National Cheng Kung University, Tainan 70101, Taiwan

<sup>2</sup> Research Center for Applied Sciences, Academia Sinica, Taipei 11529, Taiwan

<sup>3</sup> Department and Institute of Electrical Engineering, Minghsin University of Science and Technology, Hsinchu 30401, Taiwan

<sup>4</sup> Applied High Entropy Technology (AHET) Center, National Cheng Kung University, Tainan 70101, Taiwan

<sup>5</sup> Hierarchical Green-Energy Materials (Hi-GEM) Research Center, National Cheng Kung University, Tainan 70101, Taiwan

\* Correspondence: cfshih@mail.ncku.edu.tw (C.F.S.); cwpao@gate.sinica.edu.tw (C.W.P.)

<sup>†</sup> These authors contributed equally to this work.

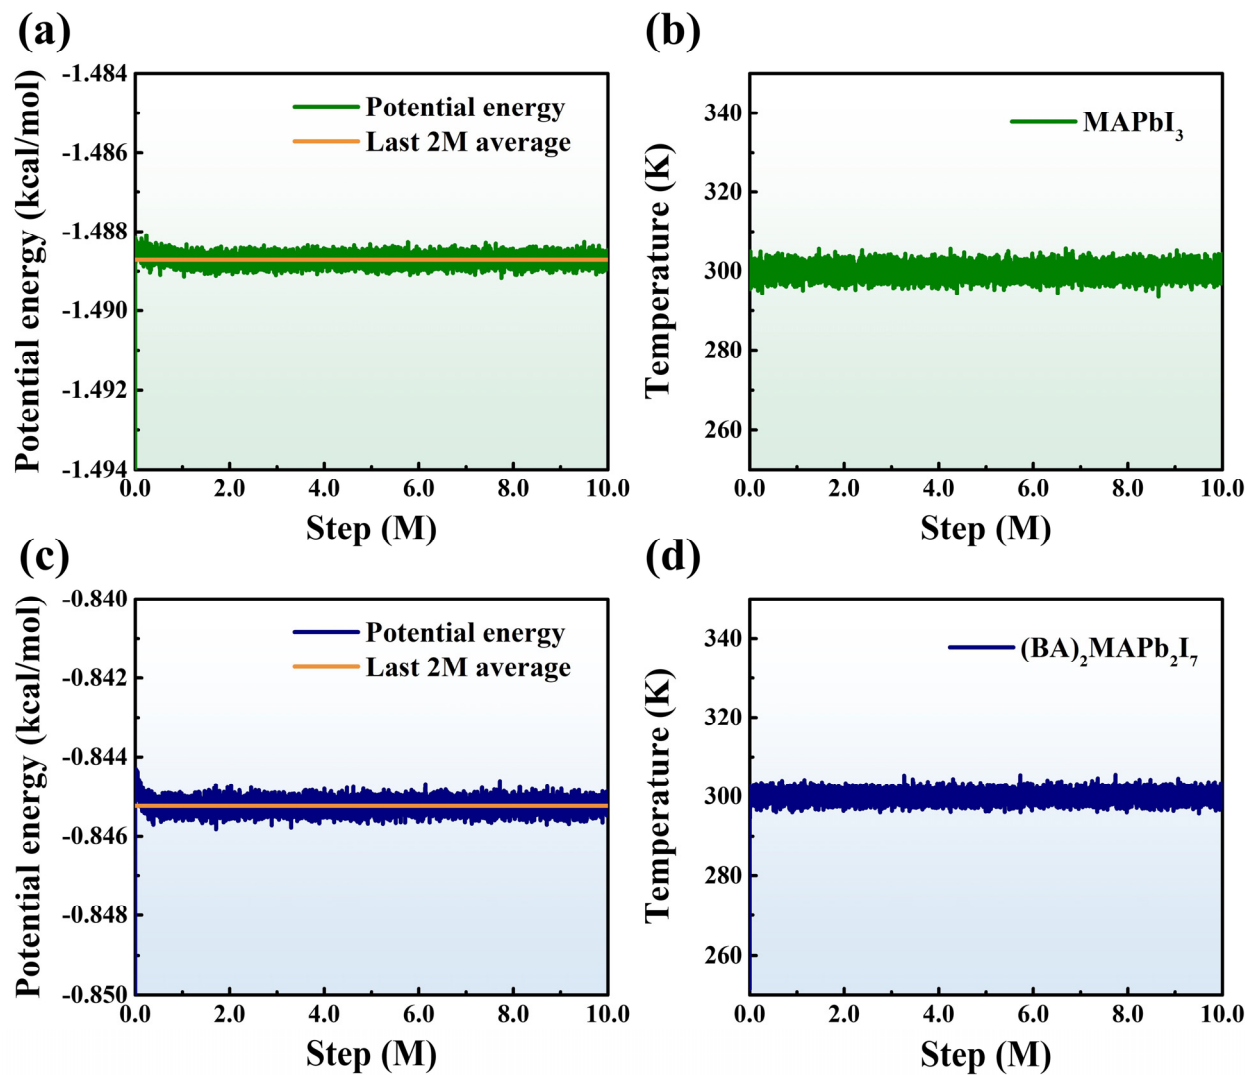

**Figure S1.** The variation of potential energy and temperature with the number of steps, (a)(b) for the 3D perovskite, and (c)(d) for the 2D perovskite.

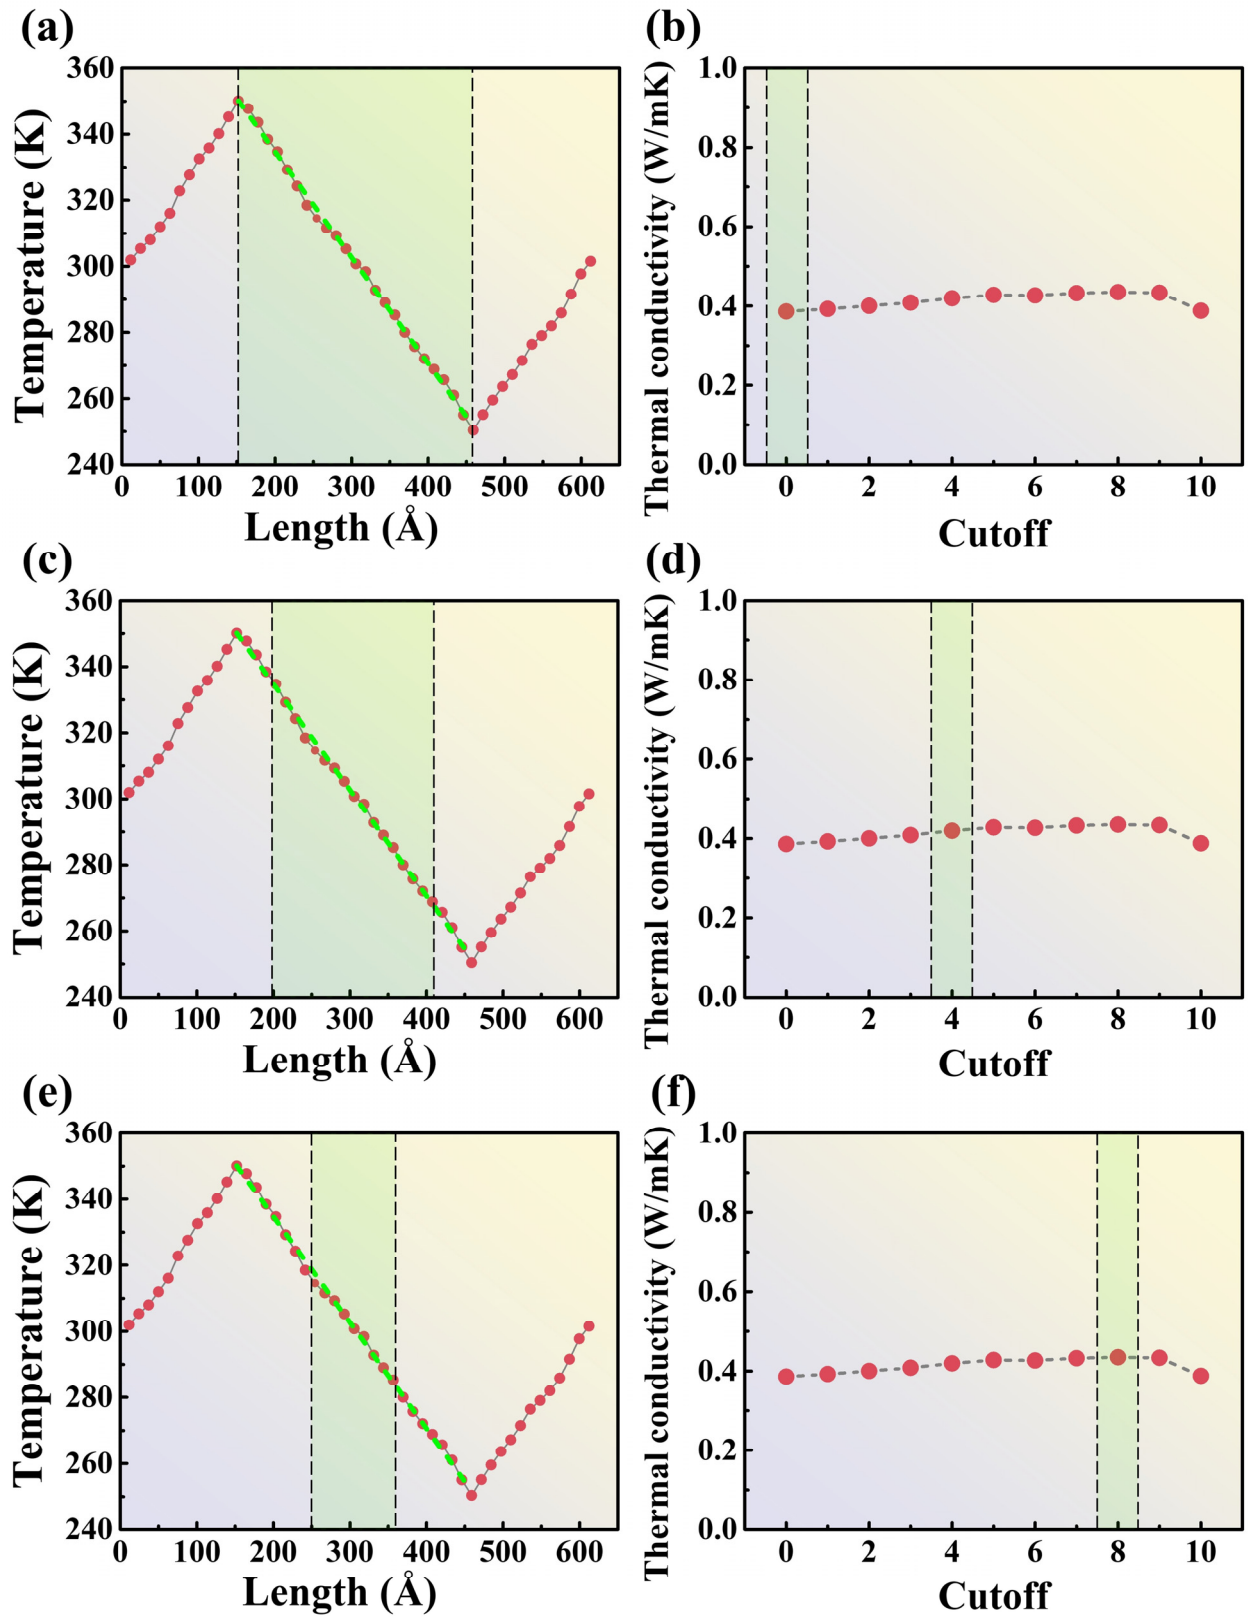

**Figure S2.** Simulate the temperature distribution and sampling range for (a)(c)(e) of the 3D perovskite, and for (b)(d)(f) of the cutoff results for thermal conductivity with the temperature sampling range.

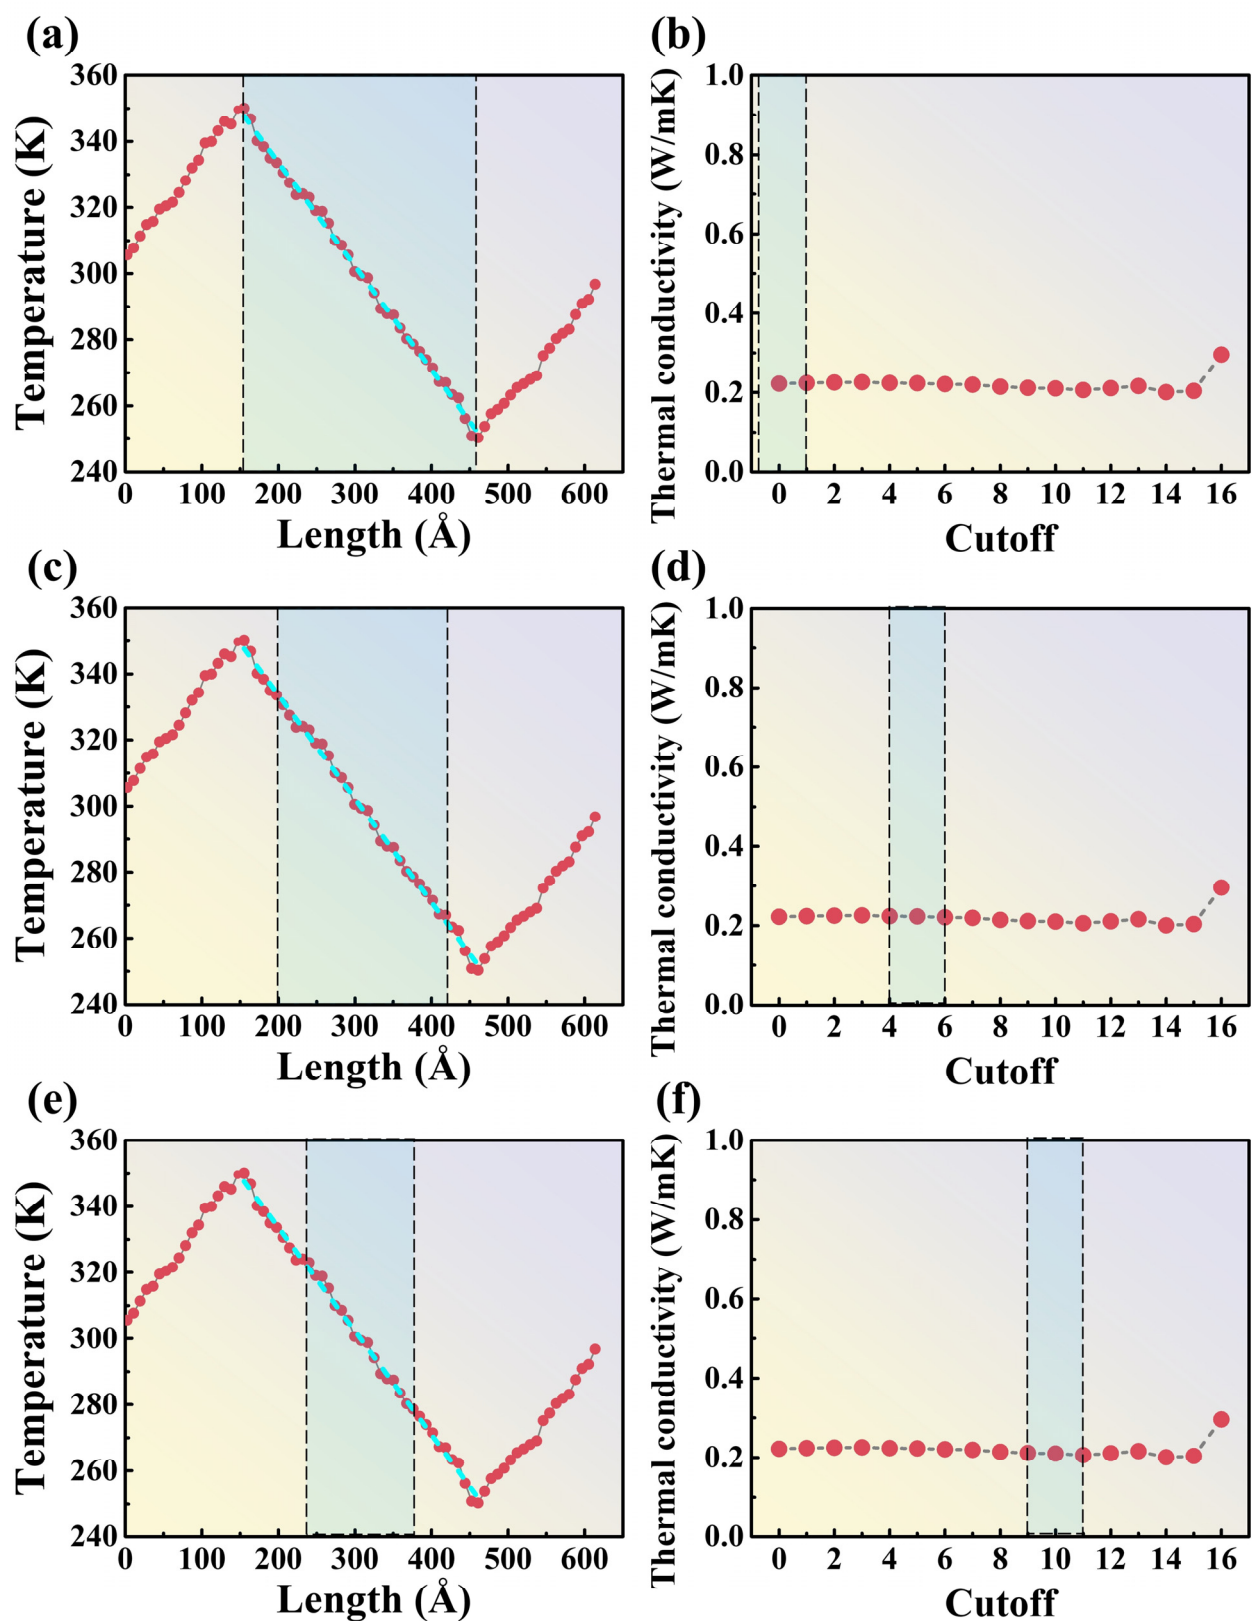

**Figure S3.** Simulate the temperature distribution and sampling range for (a)(c)(e) of the 2D perovskite, and for (b)(d)(f) of the cutoff results for thermal conductivity with the temperature sampling range.

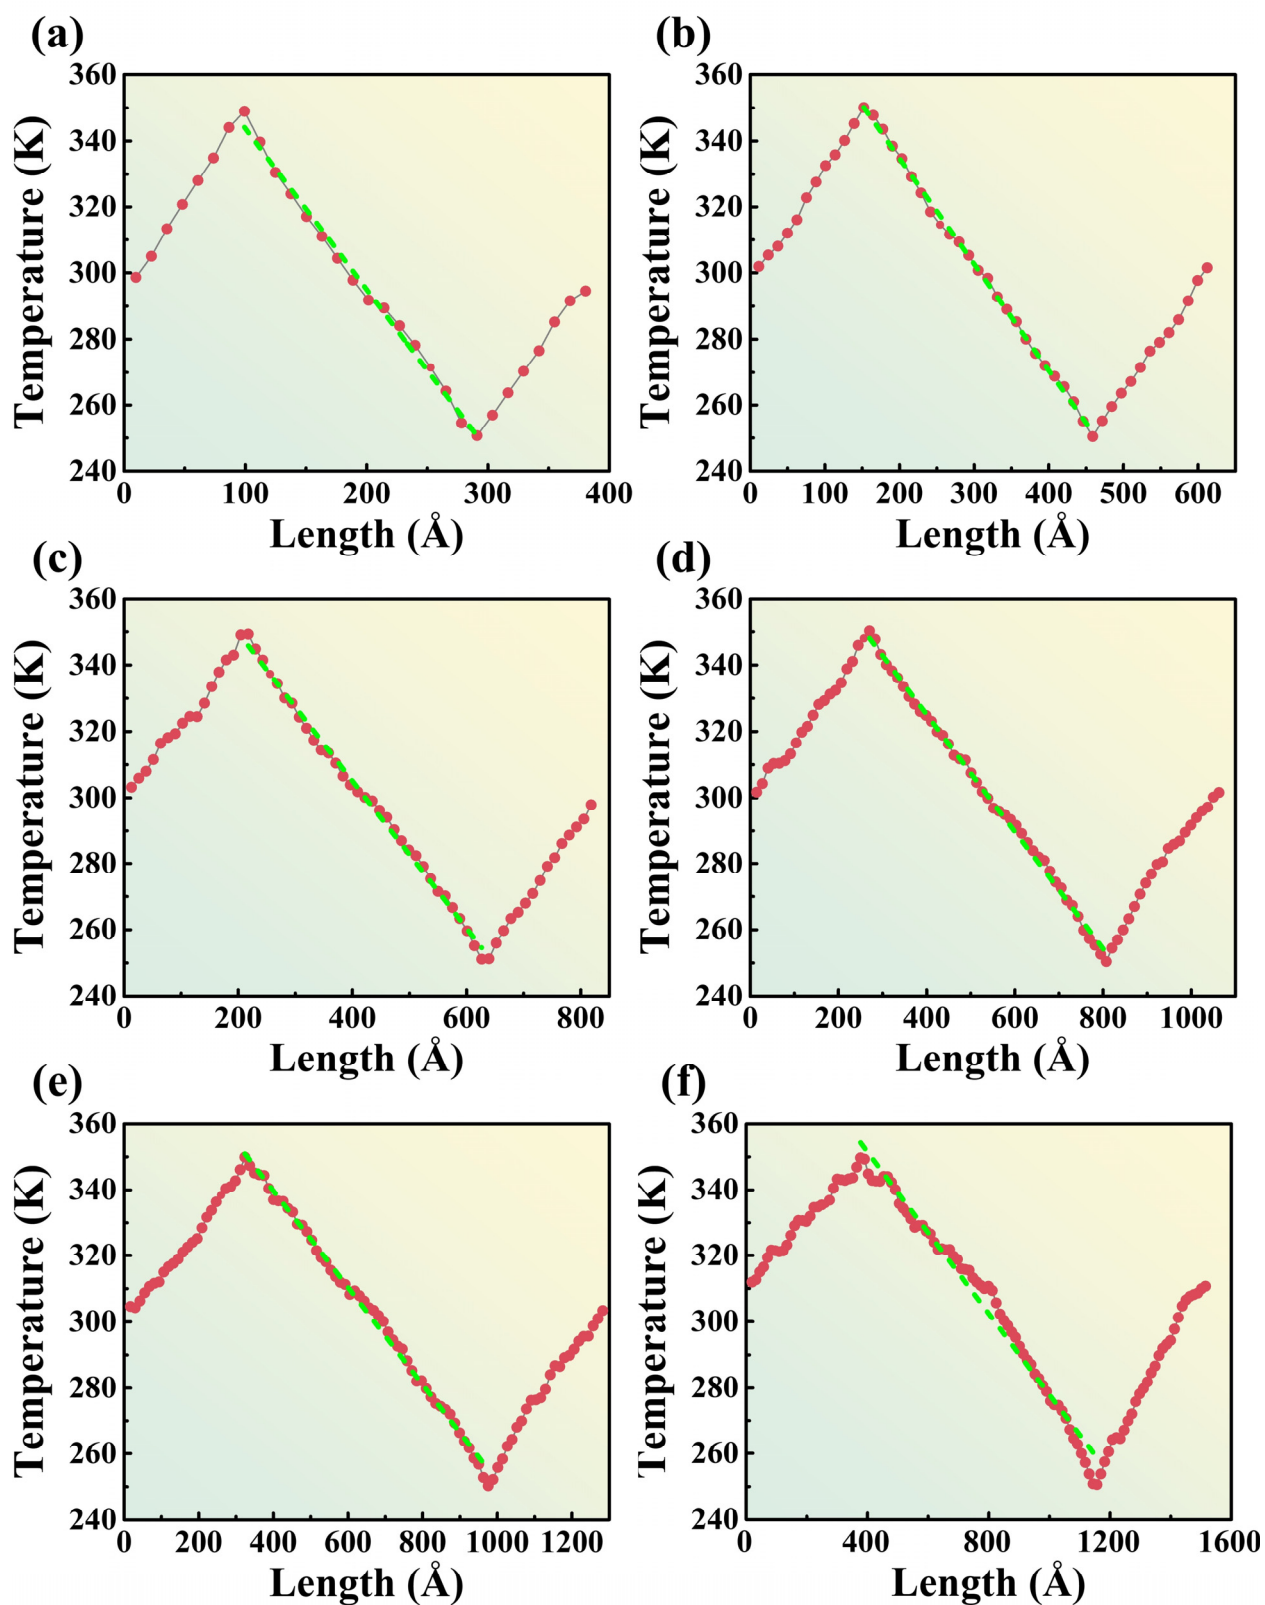

**Figure S4.** The temperature distribution maps of 3D perovskite with various sizes after completing molecular dynamics simulations.

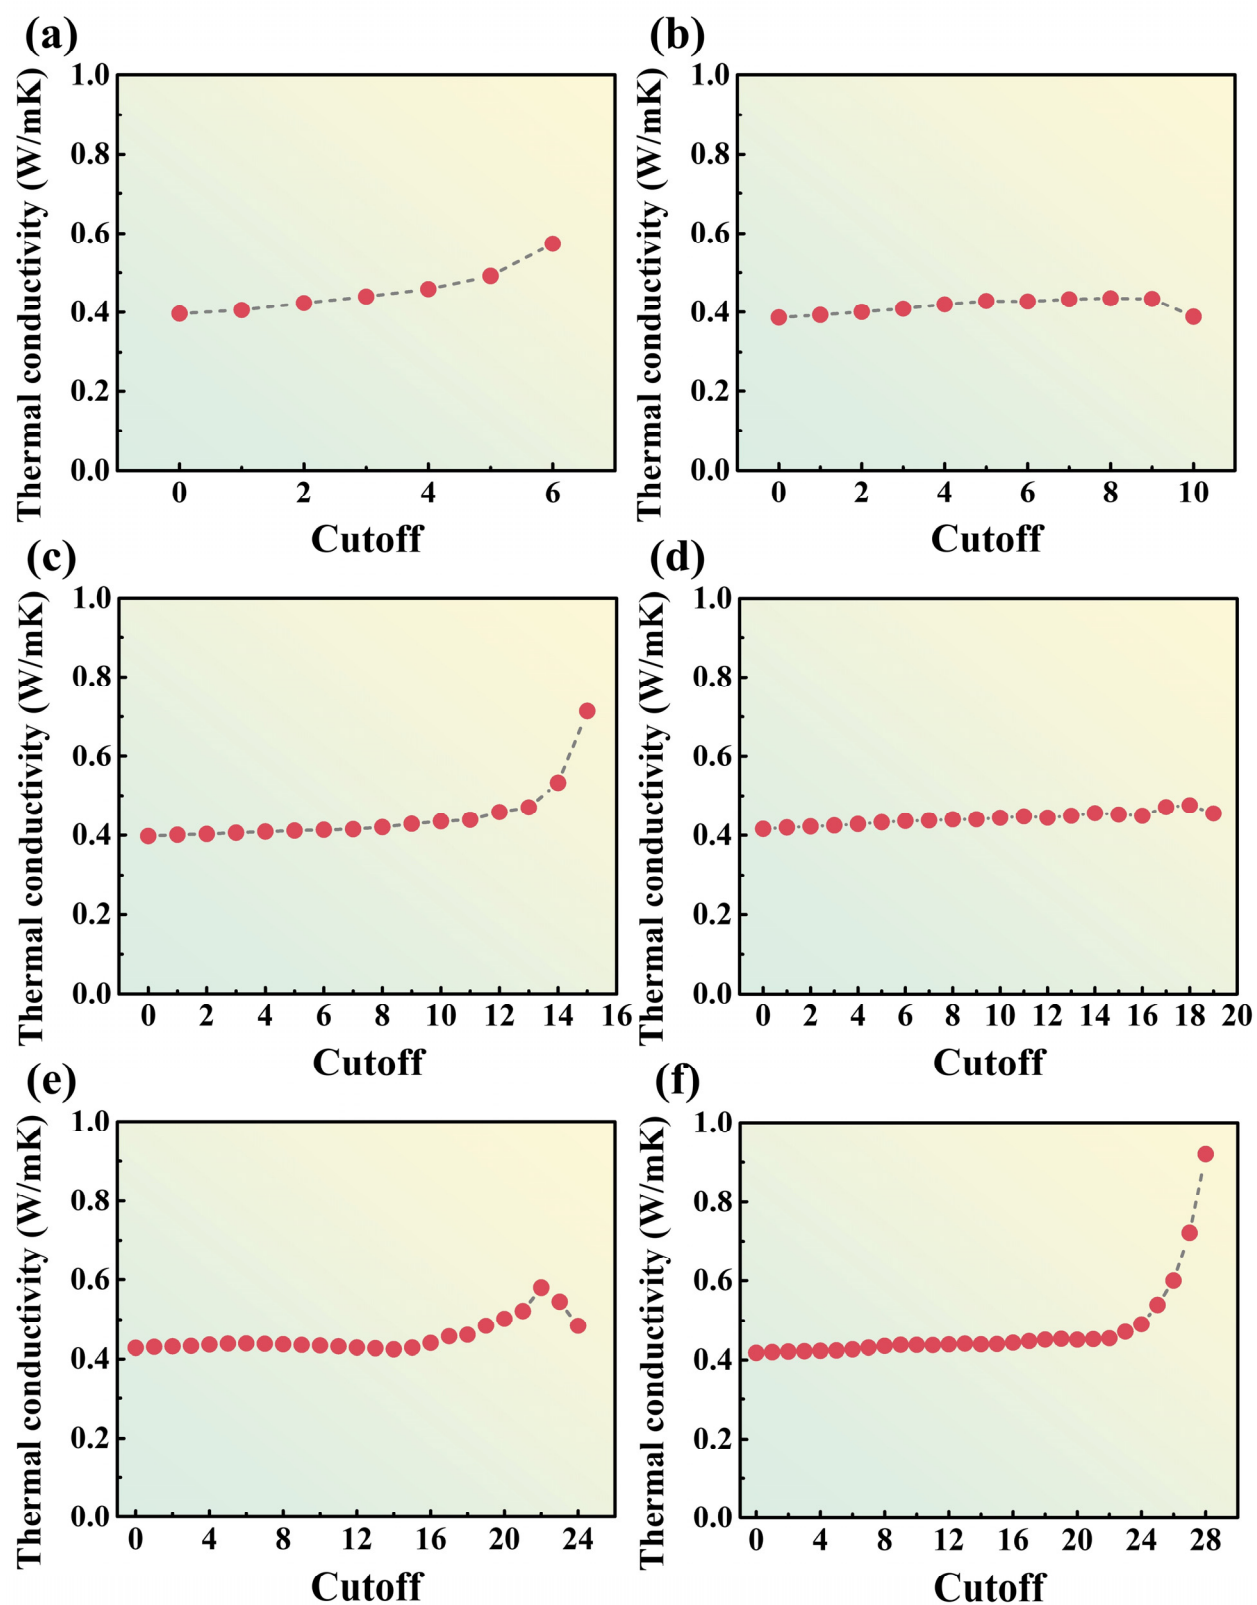

**Figure S5.** The relationship between the number of removed thin layers and thermal conductivity in 3D perovskite at different sizes.



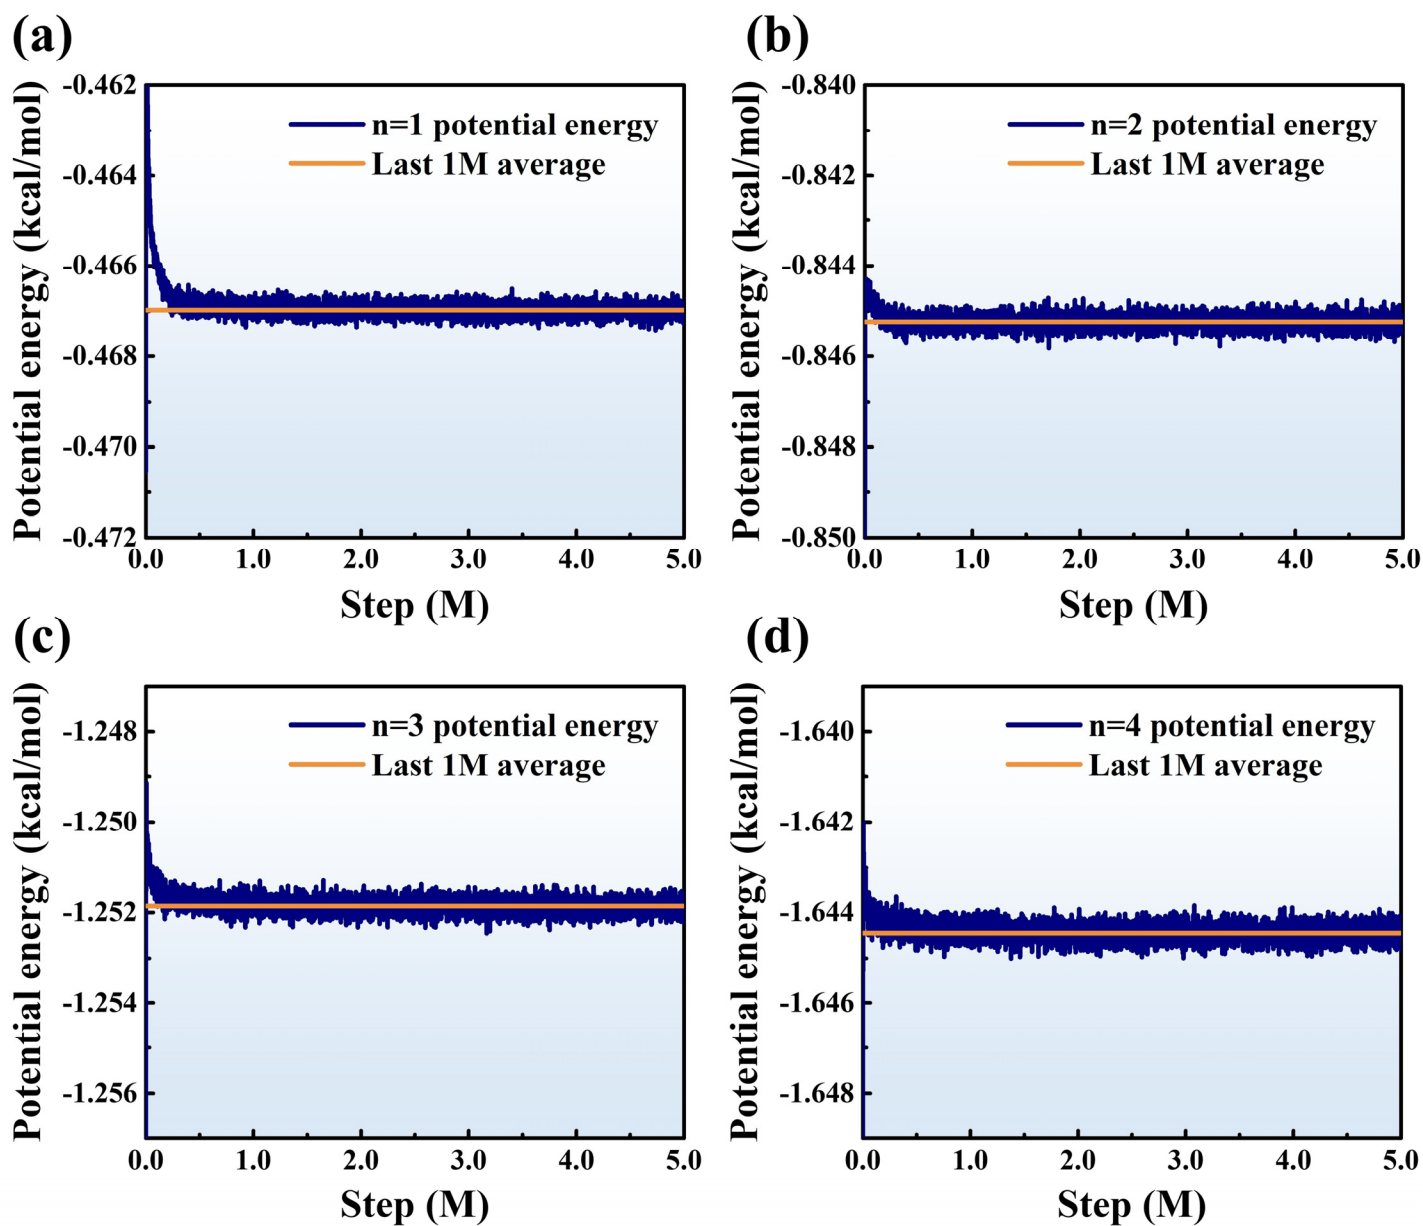

**Figure S6.** The potential energy variation with the number of steps for 2D perovskite at different  $n$  values, (a)  $n = 1$ , (b)  $n = 2$ , (c)  $n = 3$ , (d)  $n = 4$ .

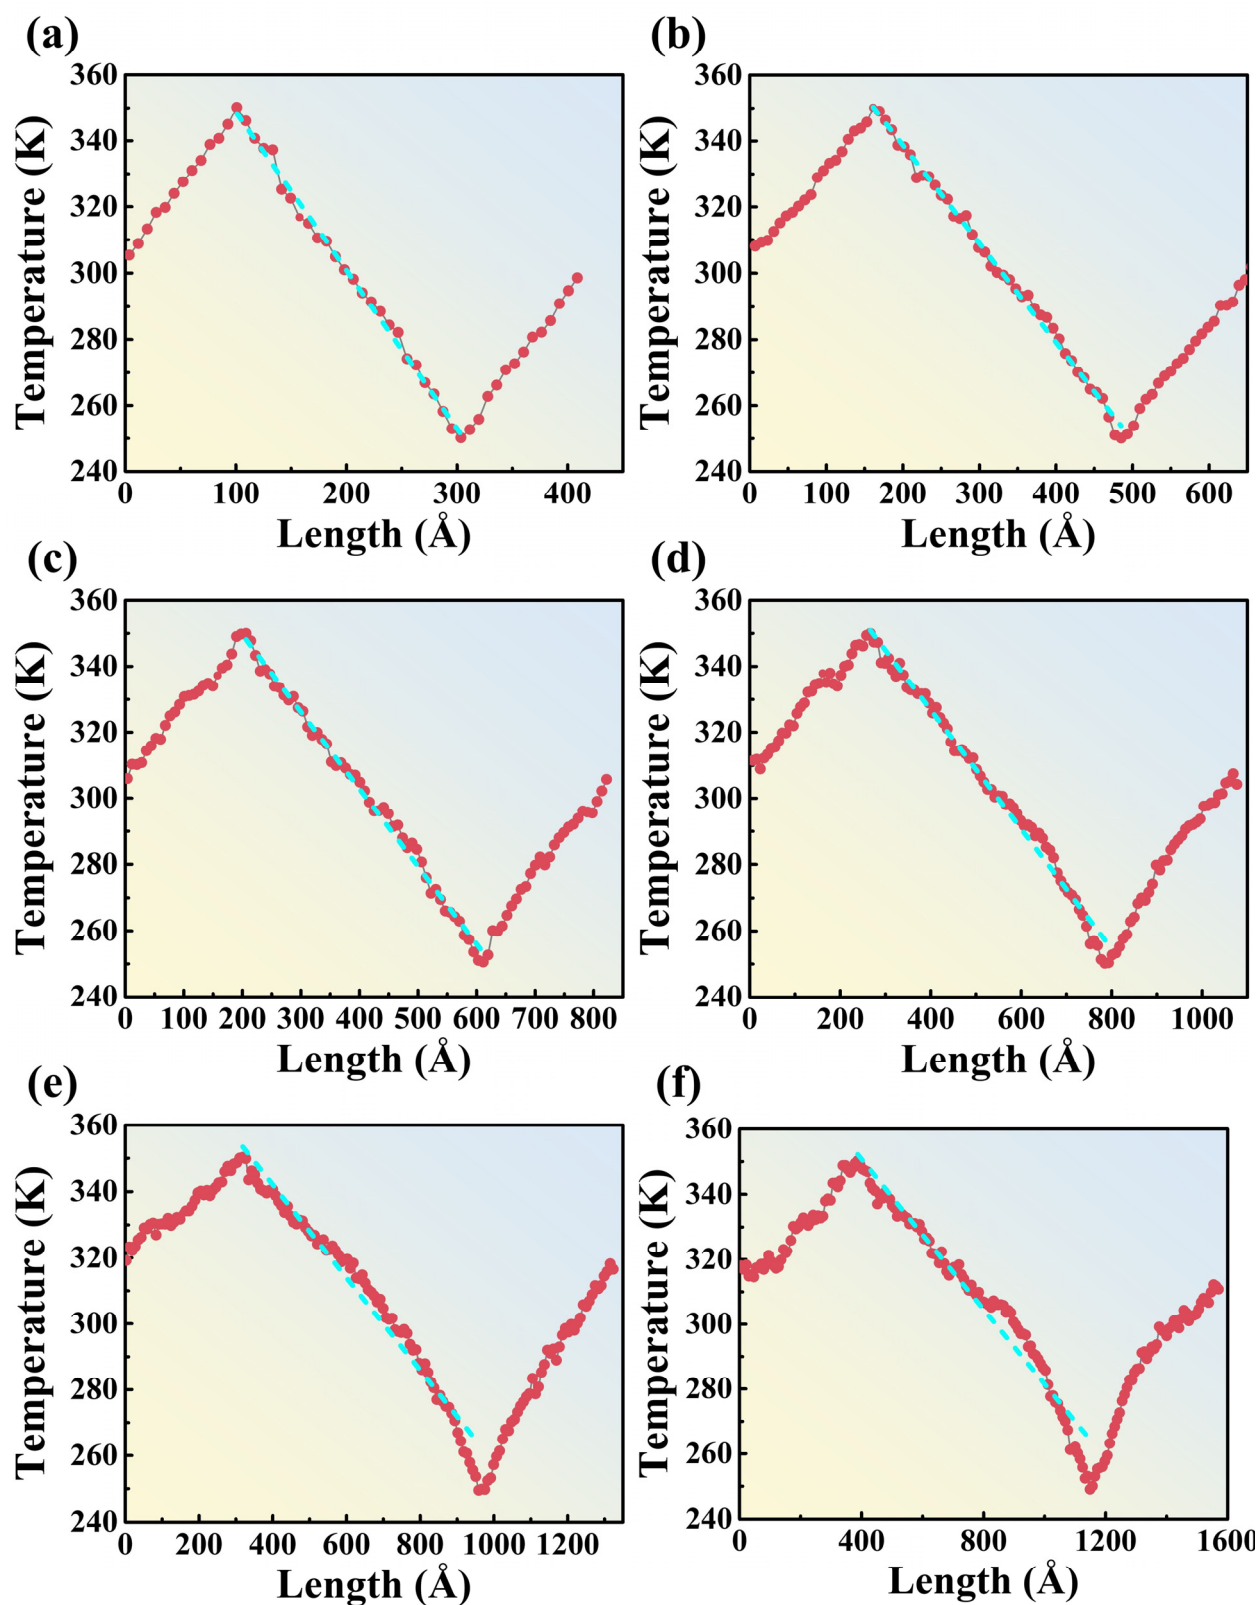

Figure S7. Temperature distribution of 2D perovskite at different lengths.



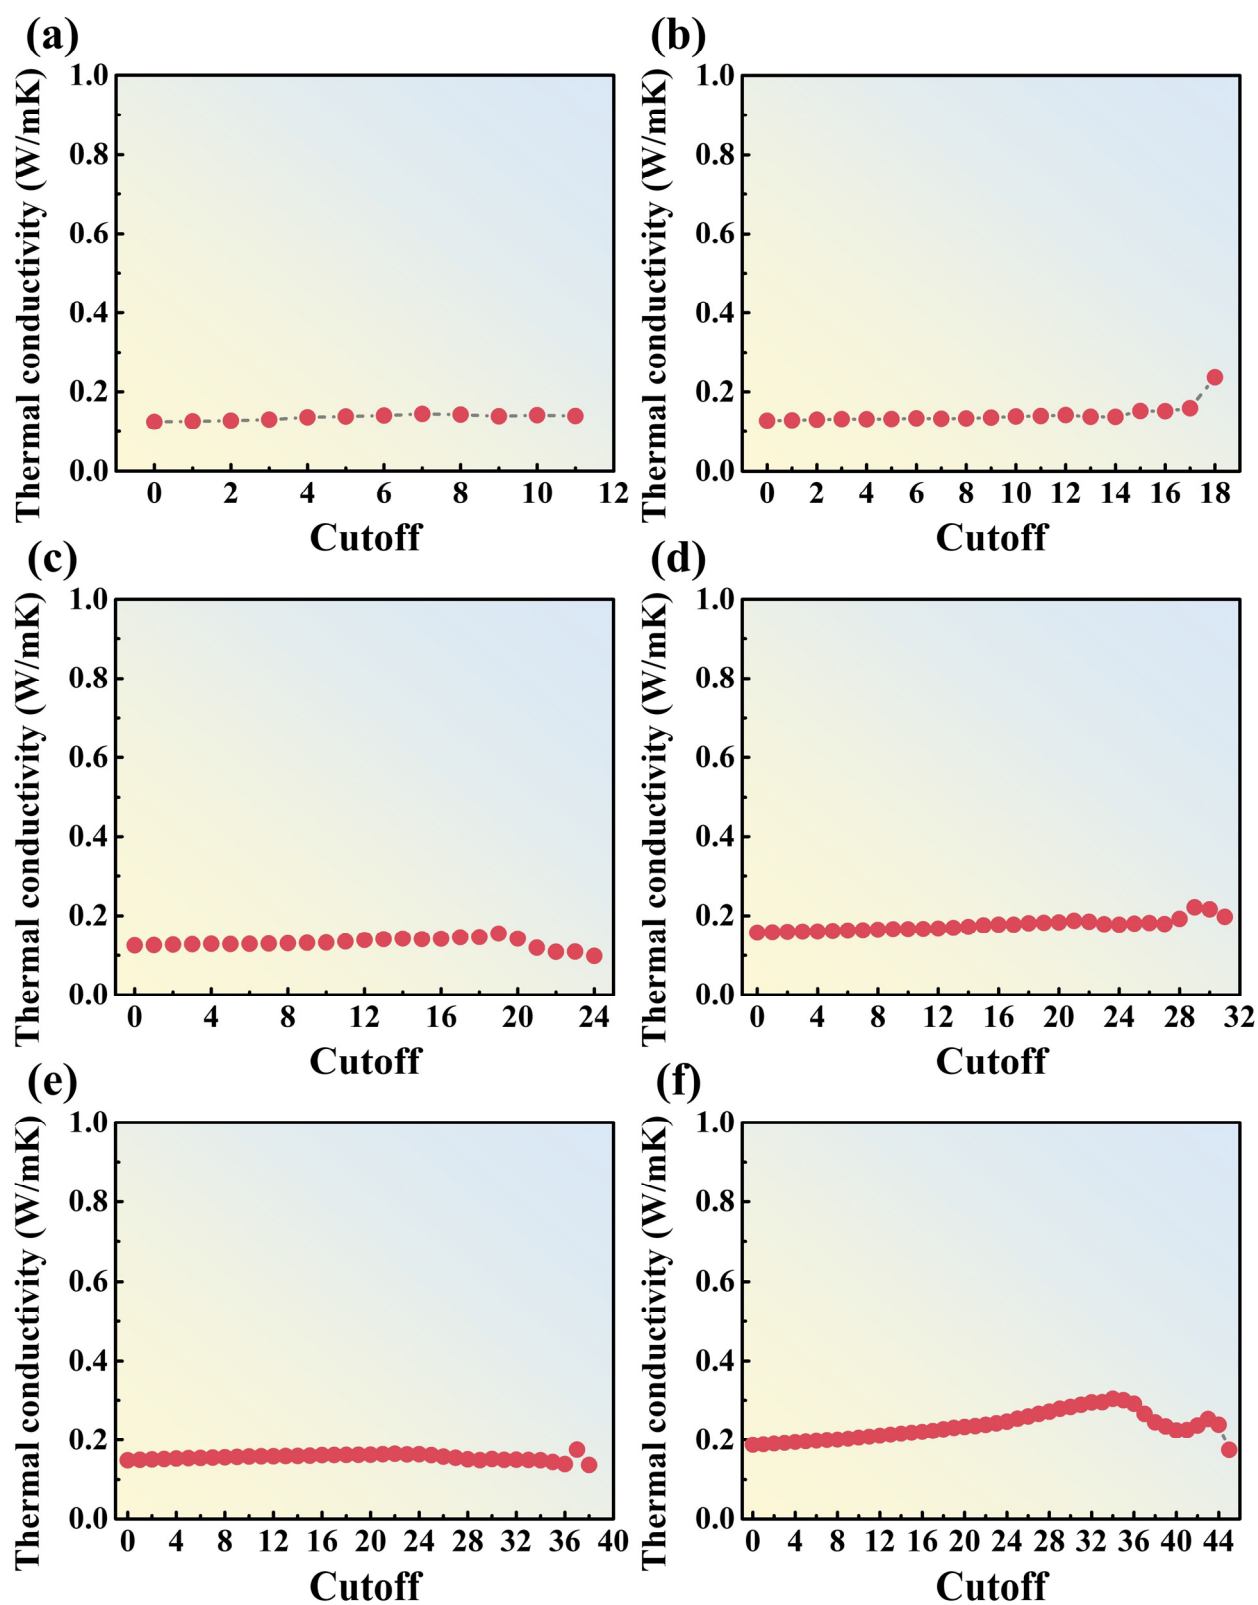

**Figure S8.** The relationship between the number of removed thin layers and thermal conductivity in 2D perovskite at different sizes.

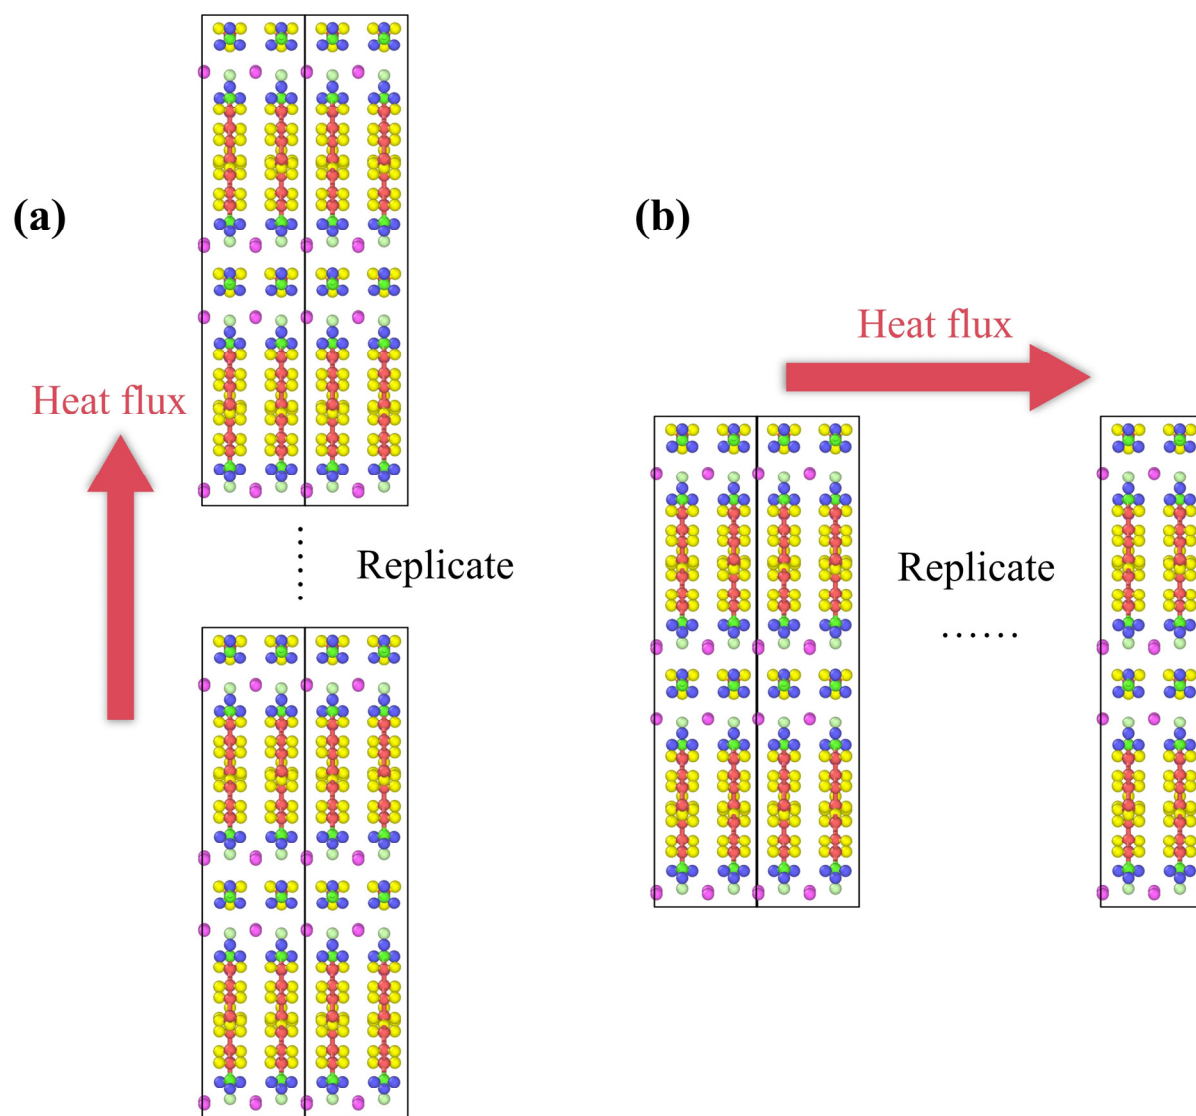

**Figure S9.** 2D perovskite with (a) parallel (b)perpendicular orientation and heat flux direction.

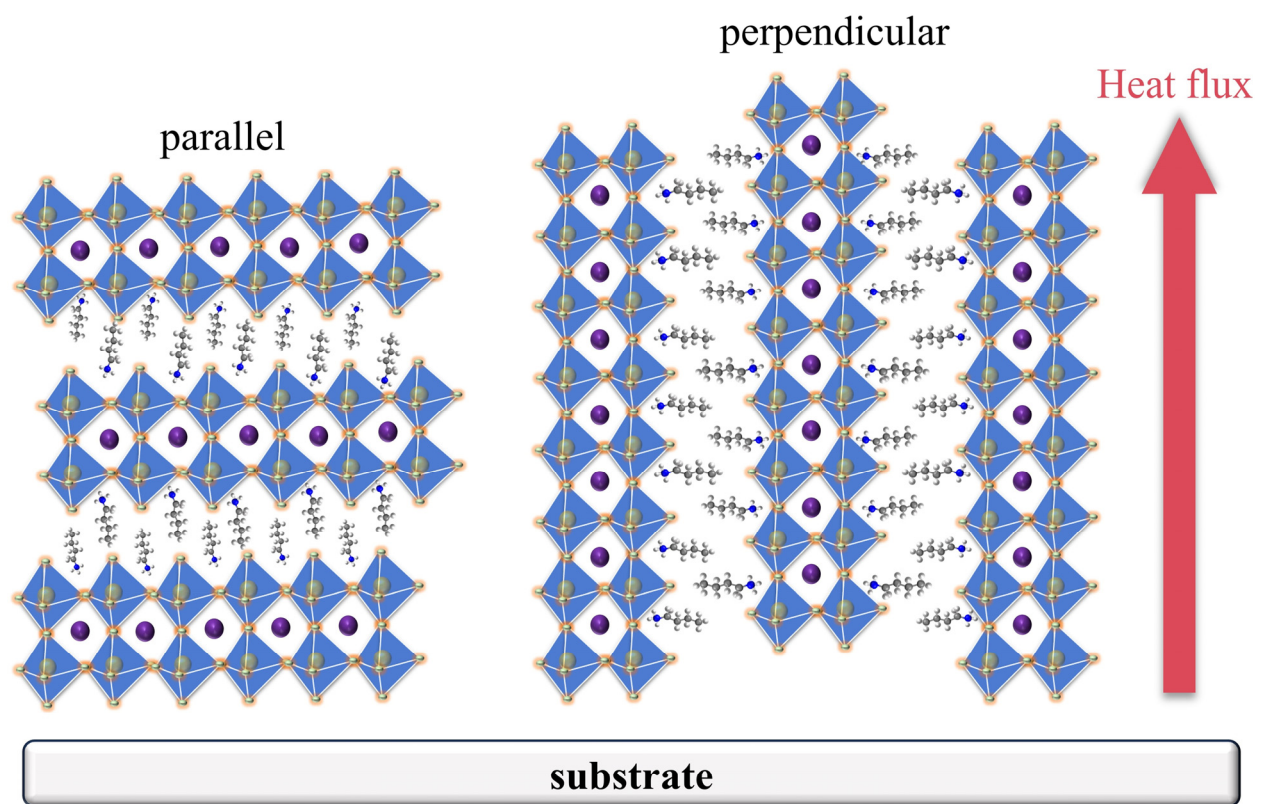

**Figure S10.** Diagram of 2D perovskite with (a) parallel (b) perpendicular orientation and heat flux direction.

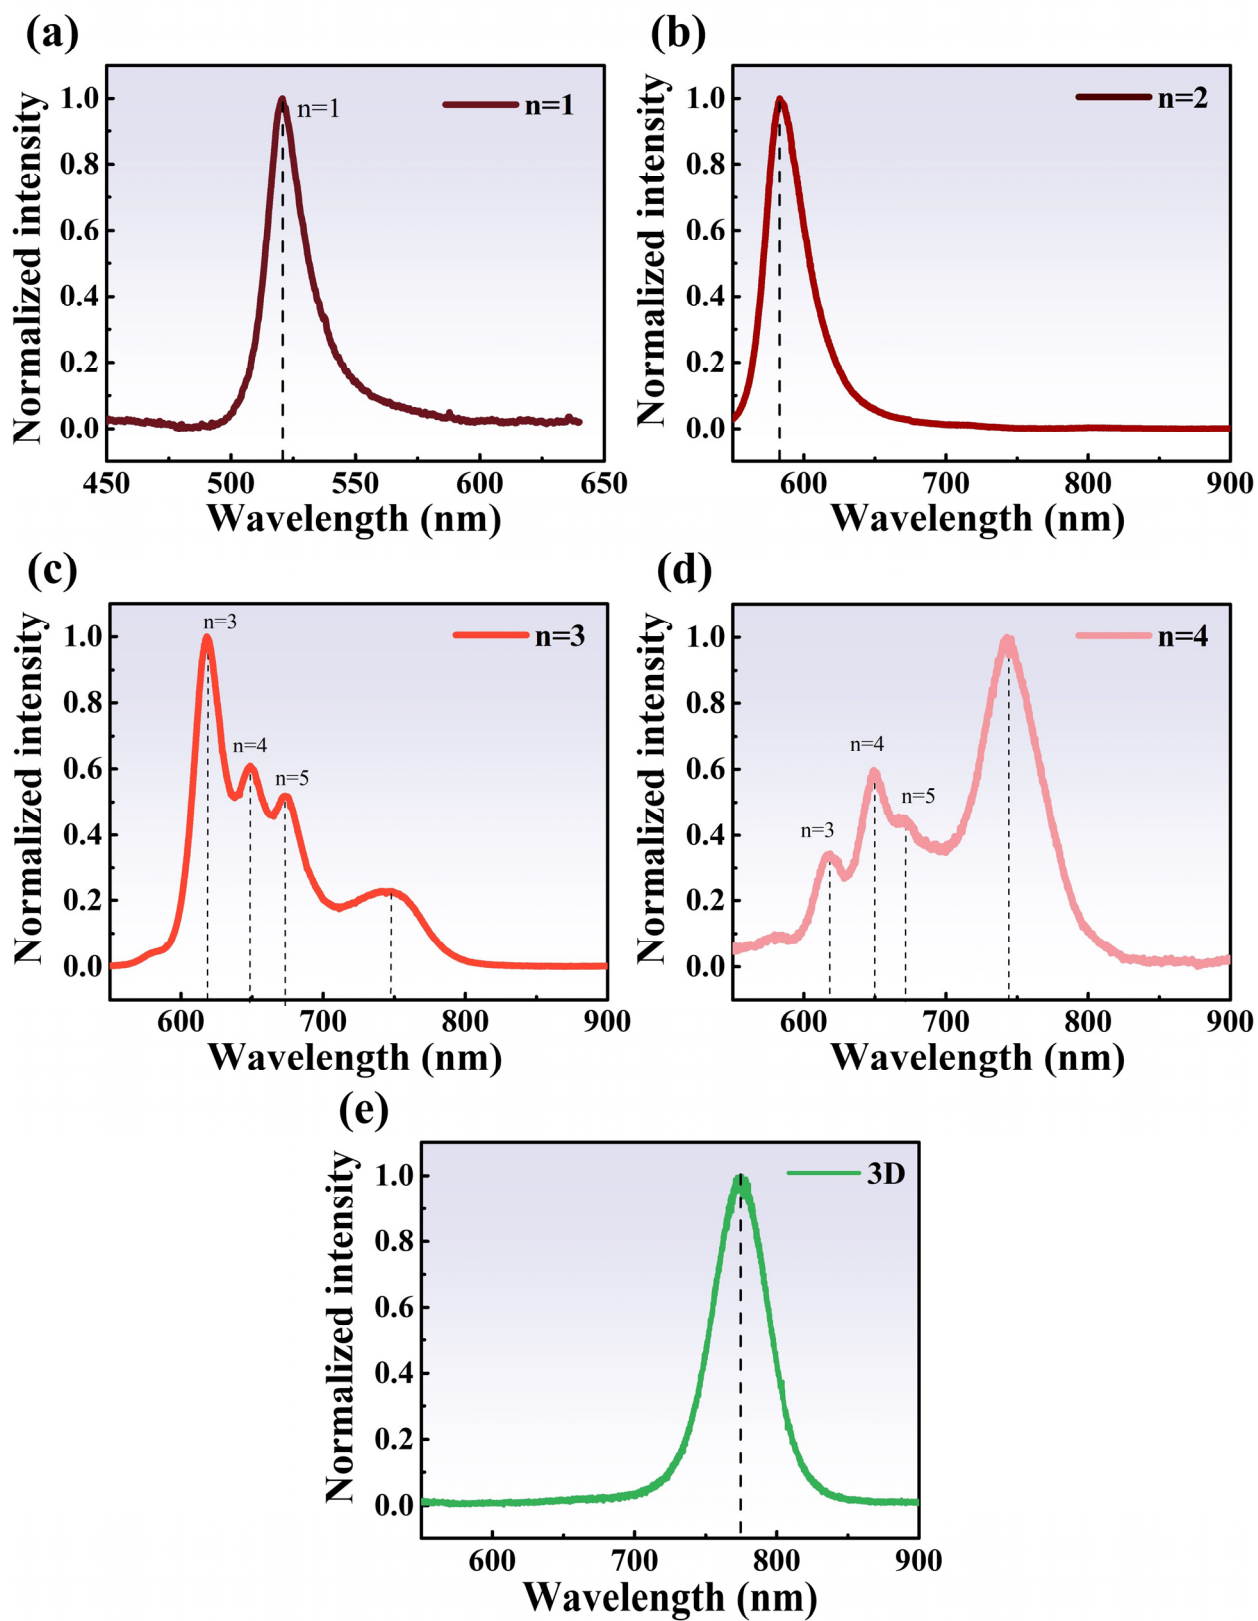

**Figure S11.** Photoluminescence analyses of (a) – (d) 2D and (e) 3D perovskite.
